# Supplementary figures and images for: Rapid bioinspired mineralization using cell membrane nanofragments and alkaline milieu
Source: Royal Society of Chemistry journal article supplement (doi:10.1039/c8tb01544a), 2018-01-01

Alkaline condition enhances extracellular matrix synthesis by chondrocytes.

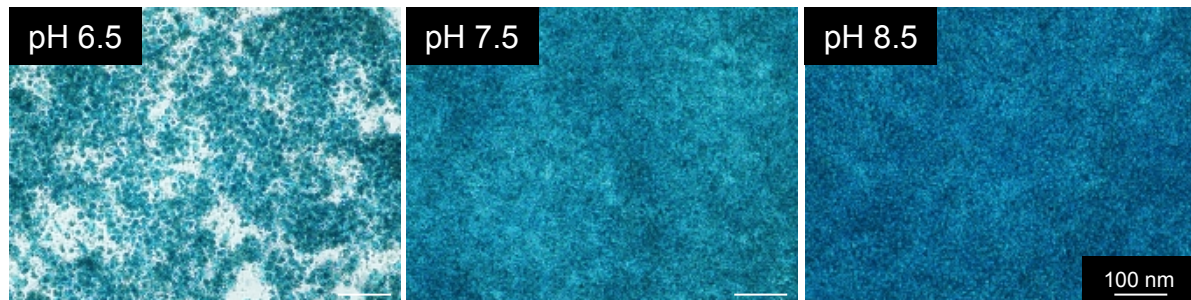

Suppl. Fig. S1

Supplement: c8tb01544a1.pdf [file c8tb01544a1.pdf]
